# Supplementary material
Source: PubMed Central journal article supplement (PMC3913164)

## Online Figure Legends

**Online Figure I. Identification of a repressor element in the porcine and human IL-1 $\alpha$  gene.** Nucleotide sequence of the porcine IL-1 $\alpha$  gene promoter and first two exons. A repressor element (boxed) was identified “downstream” or 3’ to the IL-1 $\alpha$  gene promoter, between exon 1 and exon 2, which we call repressor, downstream or RepD.

**Online Figure II. Identification of RepD in the human IL-1 $\alpha$  gene.** Nucleotide sequence of the human IL-1 $\alpha$  gene promoter and contiguous 270 bp of 3’ sequence. The first exon and a RepD-A sequence are highlighted. Other regions of identity to the porcine IL-1 $\alpha$  gene are underlined.

# Online Figure I

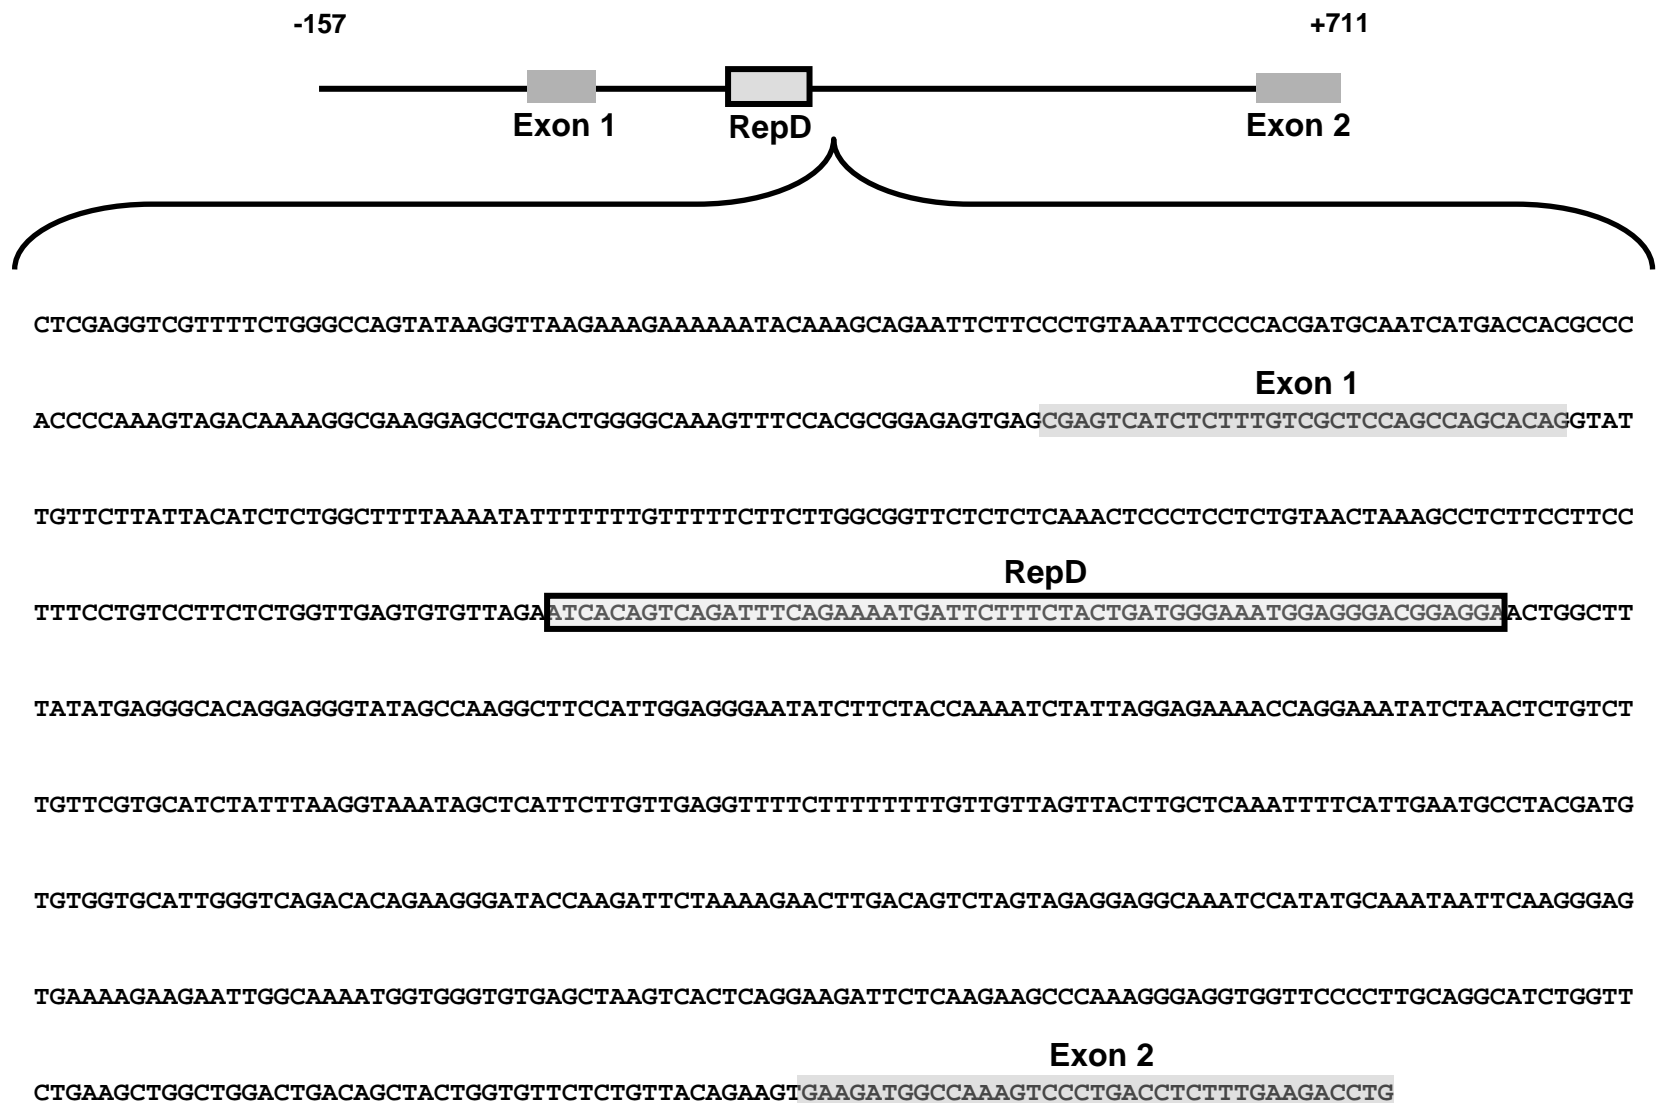

# Online Figure II

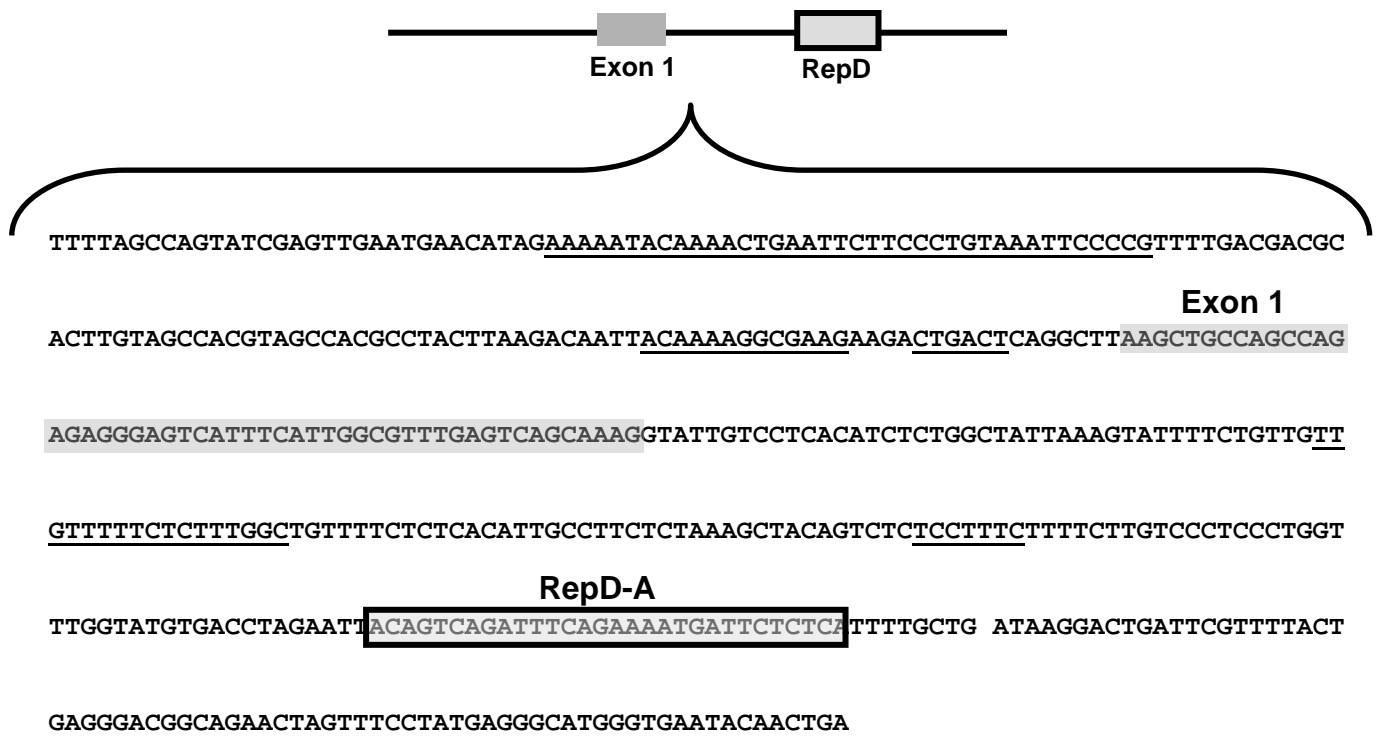

Supplement: NIHMS547984-supplement-sequences.pdf [file NIHMS547984-supplement-sequences.pdf]
